# Supplementary material
Source: PubMed Central journal article supplement (PMC2710525)
Supplement: org0502_0050SD1.pdf [file org0502_0050SD1.pdf]

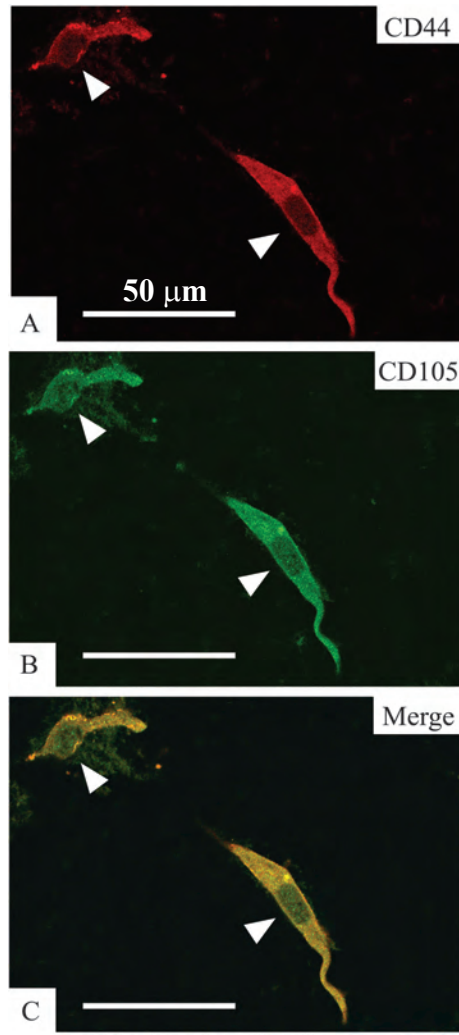

**Supplementary data-1**  
**S. Toda**

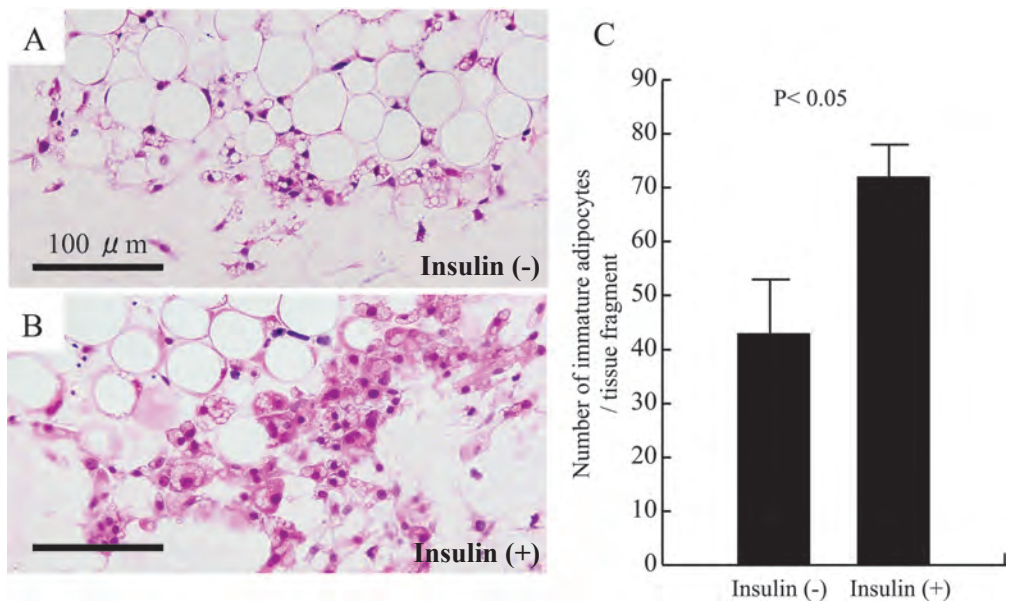

**Supplementary data-2**  
**S. Toda**

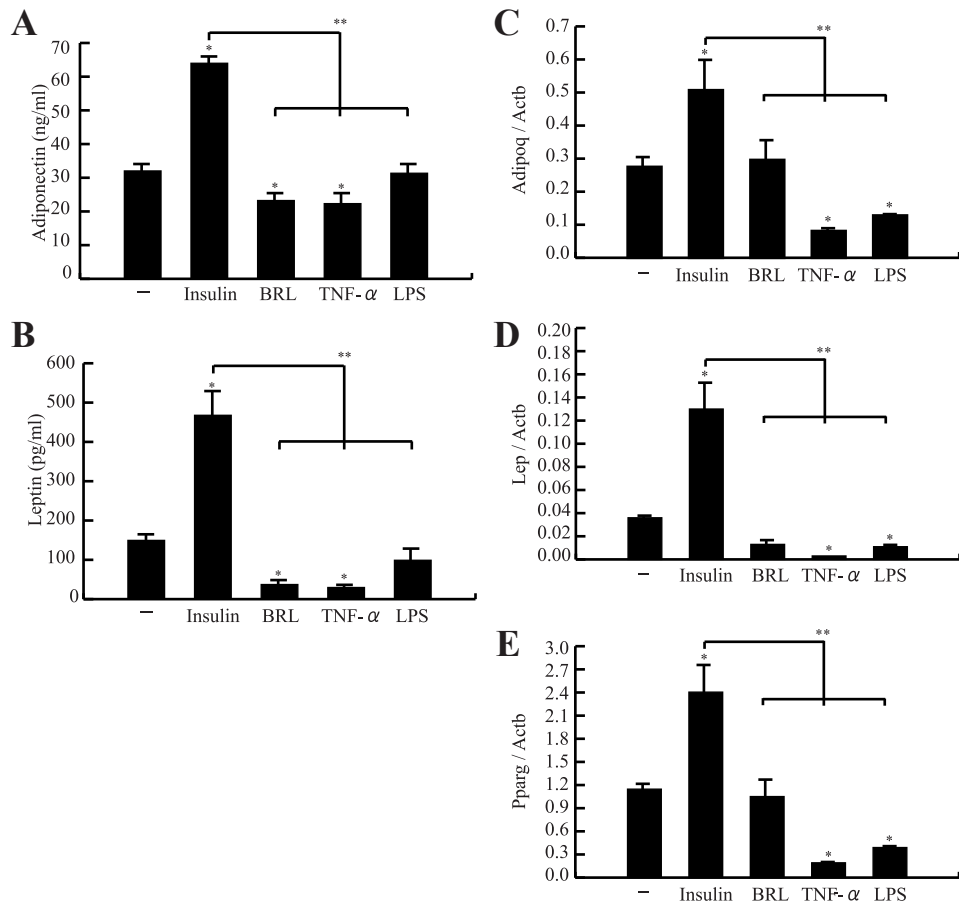

**Supplementary data-3**  
**S. Toda**

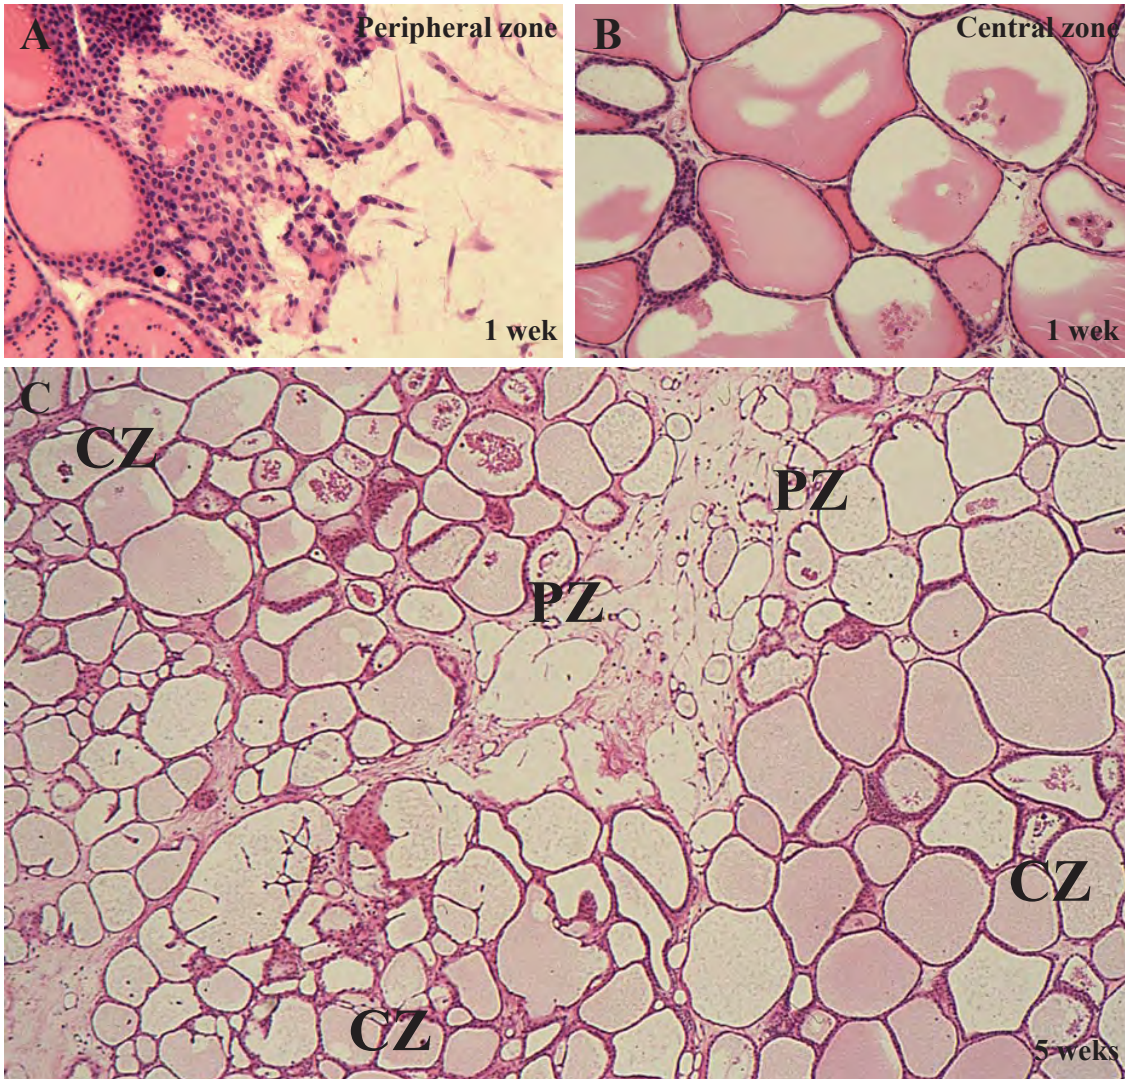

**Supplementary data-4**  
**Shuji Toda**
